# Supplementary material
Source: publisher figshare collection journal article supplement (https://sage.figshare.com/ndownloader/files/17359757)
Supplement: Supplementary file 1 [file 17359757]

**Supplementary Table 1.** Association between the biomarkers tested and Ki-67 changes using a 2-modality-variable for Ki-67% changes (N: 55).

|  |  | **Ki67changes** | |  |
| --- | --- | --- | --- | --- |
|  |  | **Other** | **Reduction**  **>5PT%** | **Fisher's Exact Test** |
|  |  | **N(%)** | **N(%)** | **p-value** |
| **γ-H2AX** | Negative | 22 (64.7) | 12 (35.3) | 0.094 |
|  | Positive | 8 (38.1) | 13 (61.9) |  |
| **p-ATM** | Negative | 16 (61.5) | 10 (38.5) | 0.419 |
|  | Positive | 14 (48.3) | 15 (51.7) |  |
| **p-ATR** | Negative | 2 (66.7) | 1 (33.3) | 0.999 |
|  | Positive | 28 (53.8) | 24 (46.2) |  |
| **γ-H2AX/p-ATM** | other | 28 (65.1) | 15 (34.9) | 0.007 |
|  | γ-H2AX+/p-ATM+ | 2 (16.7) | 10 (83.3) |  |
| **γ-H2AX/p-ATR** | other | 22 (64.7) | 12 (35.3) | 0.094 |
|  | γ-H2AX+/p-ATR+ | 8 (38.1) | 13 (61.9) |  |
